# Supplementary material for: Intramolecular charge transfer character in tetrathiafulvalene-annulated porphyrinoids: effects of core modification and protonation
Source: Royal Society of Chemistry journal article supplement (doi:10.1039/c4cp05385k), 2015-01-01
Supplement: c4cp05385k1.pdf [file c4cp05385k1.pdf]

Electronic Supplementary Information

for

**Intramolecular charge transfer character in tetrathiafulvalene-annulated porphyrinoids: Effects on core modification and protonation**

*Ramababu Bolligarla<sup>a</sup>, Masatoshi Ishida<sup>\*b</sup>, Vijayendra S. Shetti,<sup>c</sup> Kazuhisa Yamasumi<sup>b</sup>,  
Hiroyuki Furuta<sup>b</sup>, and Chang-Hee Lee<sup>\*a</sup>*

*<sup>a</sup>Department of Chemistry, Kangwon National University, ChunCheon 200-701, Korea*

*<sup>b</sup>Department of Chemistry and Biochemistry, Graduate School of Engineering and Education Center for Global Leaders in Molecular Systems for Devices, Kyushu University 744 Motoooka, Nishi-ku, Fukuoka, 819-0395, Japan*

*<sup>c</sup> Department of Chemistry, BMS College of Engineering, Bull Temple Road, Bangalore 560019, India*

**CORRESPONDING AUTHORS**

E-mail: [chhlee@kangwon.ac.kr](mailto:chhlee@kangwon.ac.kr) (C.-H. L.); [ishida@molecular-device.kyushu-u.ac.jp](mailto:ishida@molecular-device.kyushu-u.ac.jp) (M.I.)

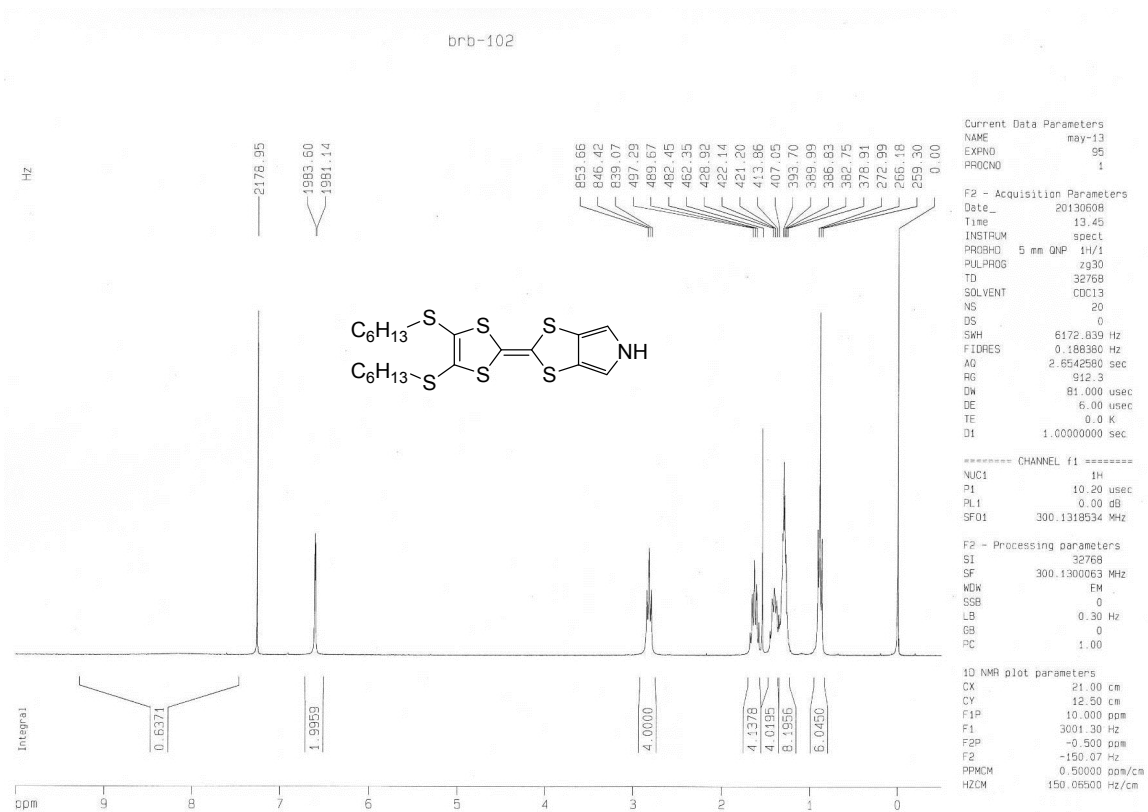

**Figure S1.**  $^1\text{H}$  NMR spectrum of compound **7** in  $\text{CDCl}_3$

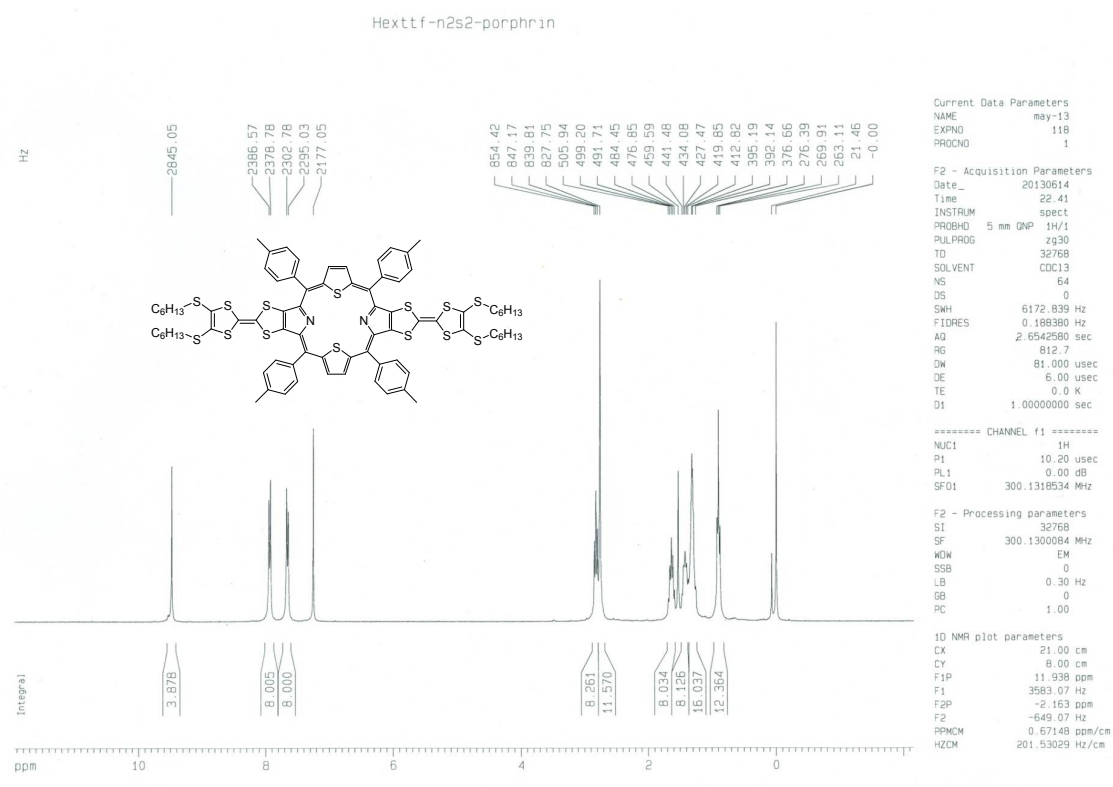

Figure S2. <sup>1</sup>H NMR spectrum of **1** recorded in CDCl<sub>3</sub>

Hex5HC-pgv-N2S2-porphyrin

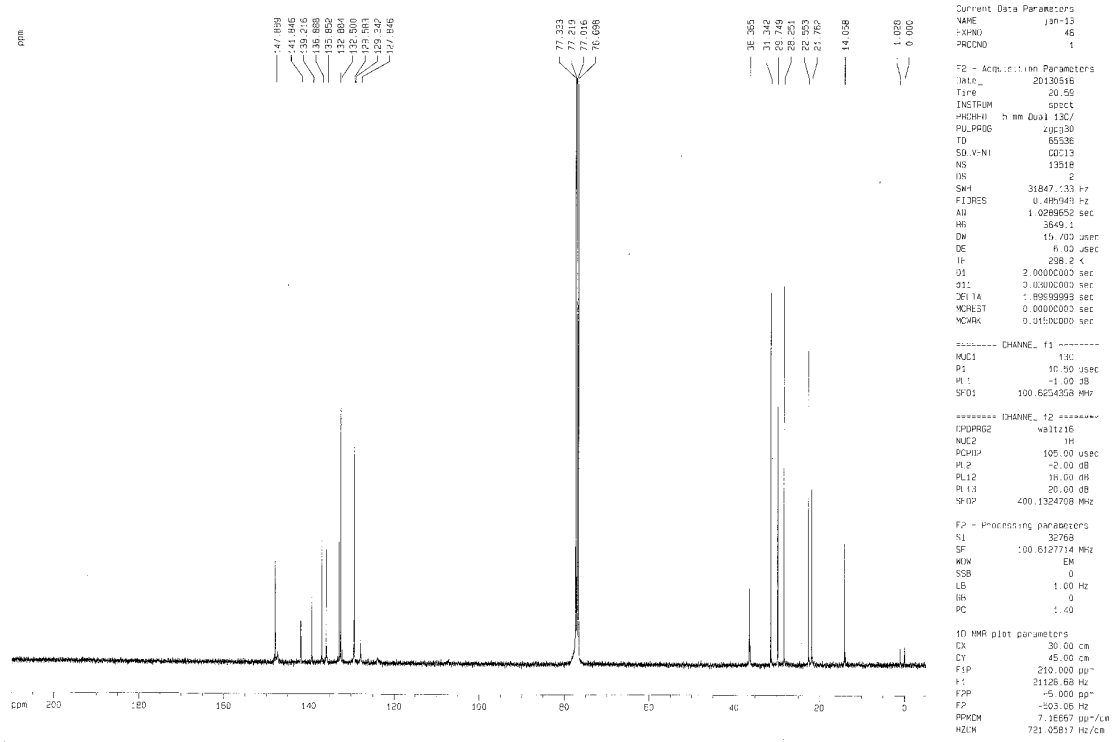

Hex5HC-pgv-N2S2-porphyrin

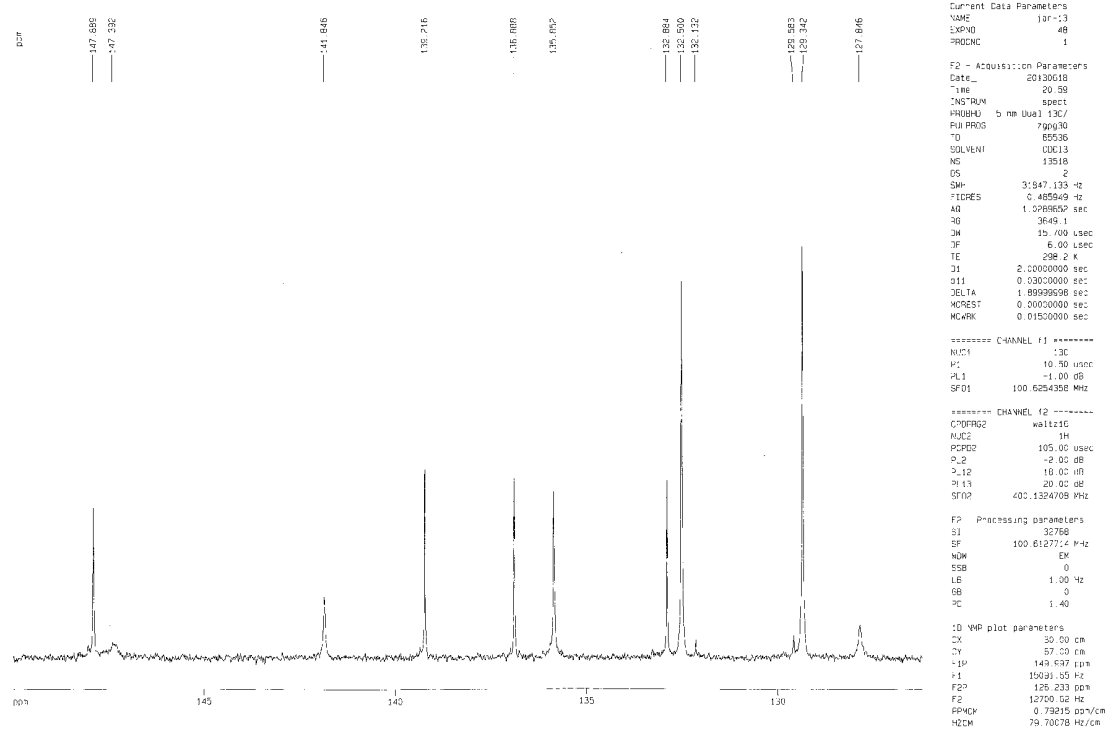

Figure S3. <sup>13</sup>C NMR (top) and its magnified (bottom) spectrum of **1** recorded in CDCl<sub>3</sub>

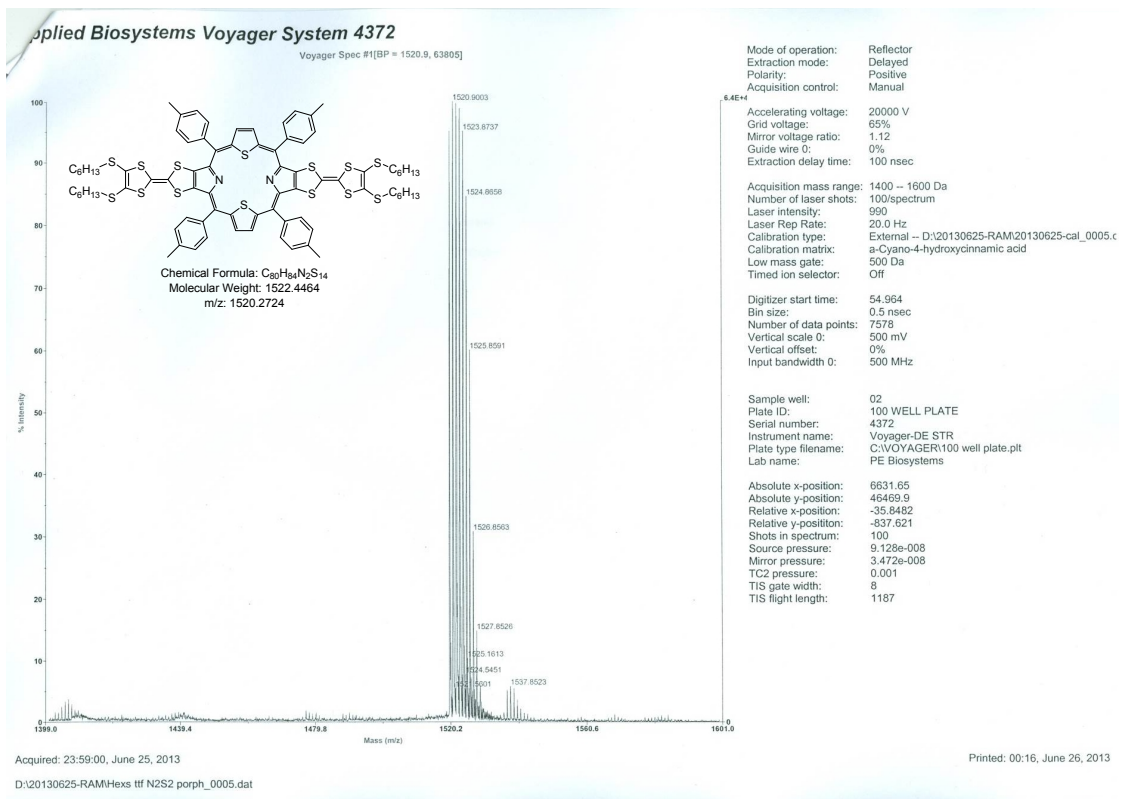

Figure S4. MALDI-TOF mass spectrum of compound 1

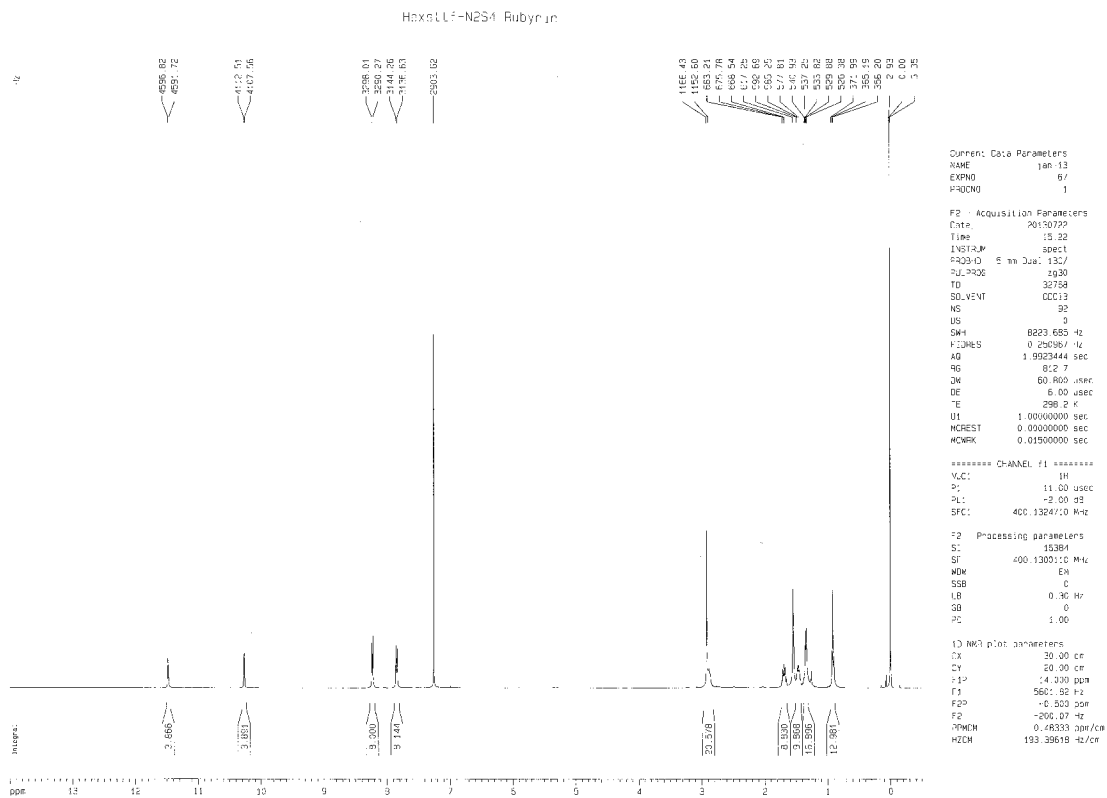

**Figure S5.**  $^1\text{H}$  NMR spectrum of **2** recorded in  $\text{CDCl}_3$

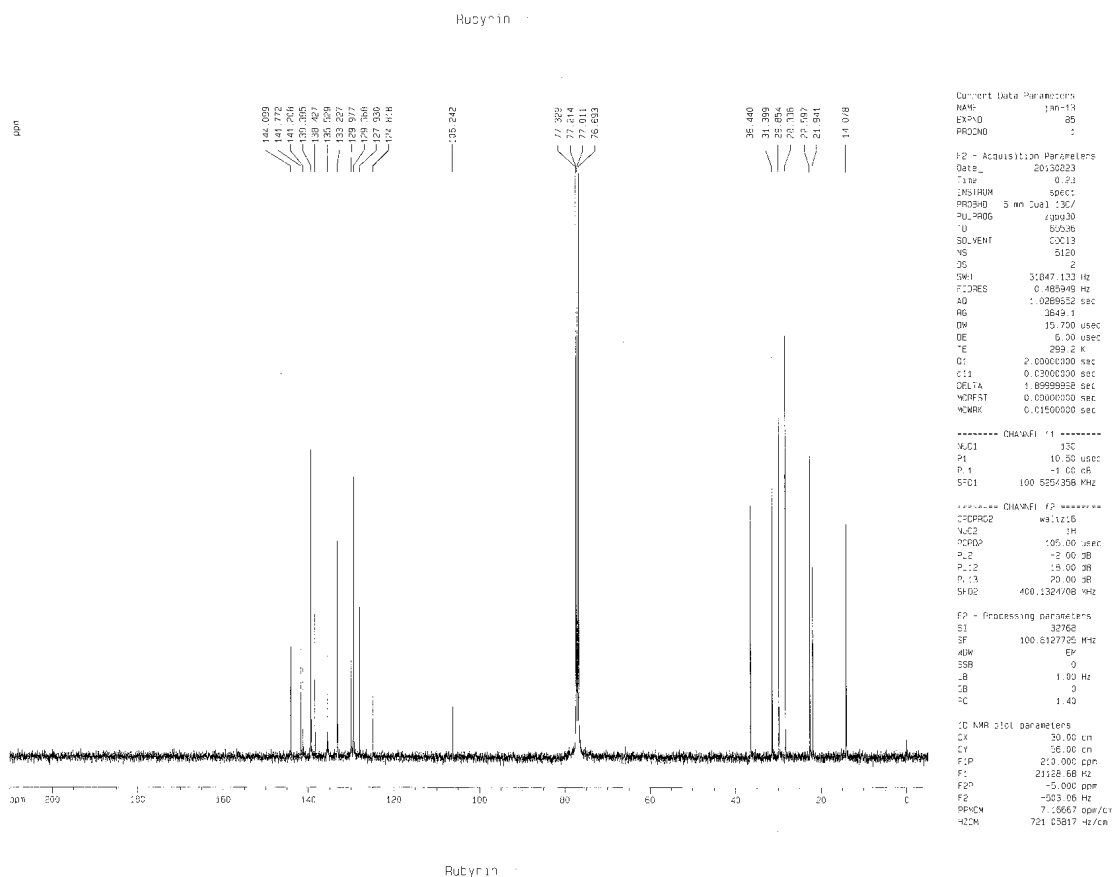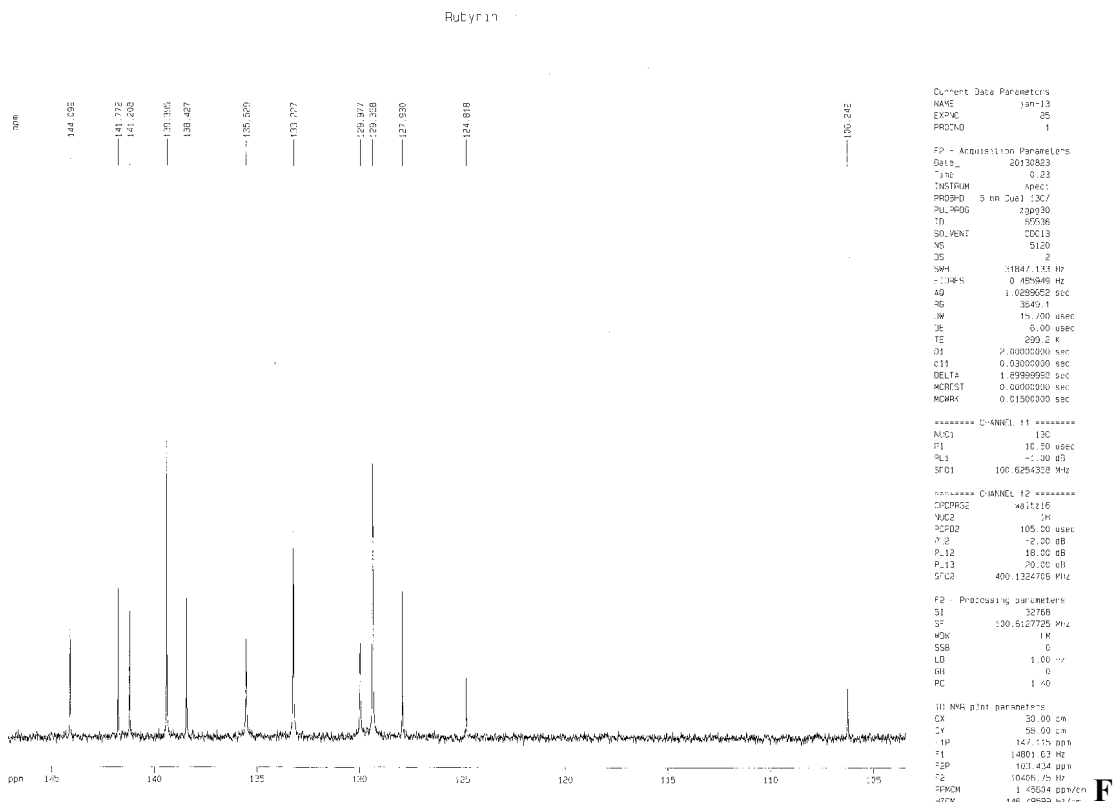

Figure S6. <sup>13</sup>C NMR (top) and the magnified (bottom) spectrum of **2** recorded in CDCl<sub>3</sub>

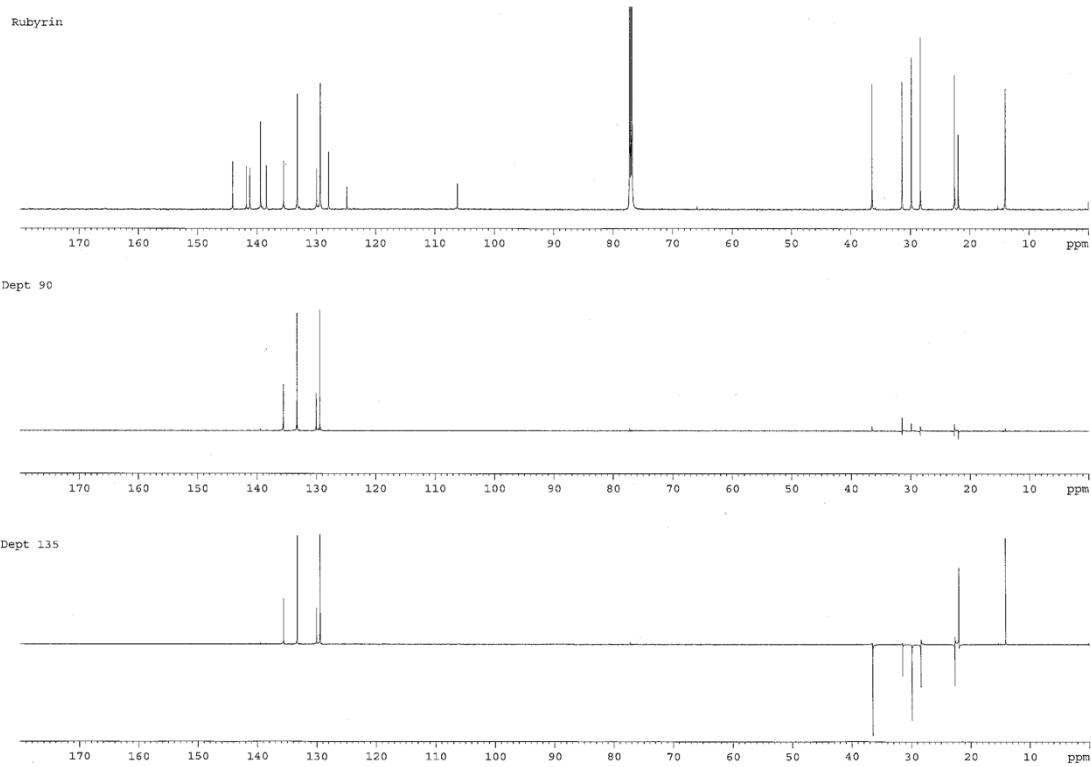

**Figure S7.** DEPT spectra of **2** recorded in CDCl<sub>3</sub>



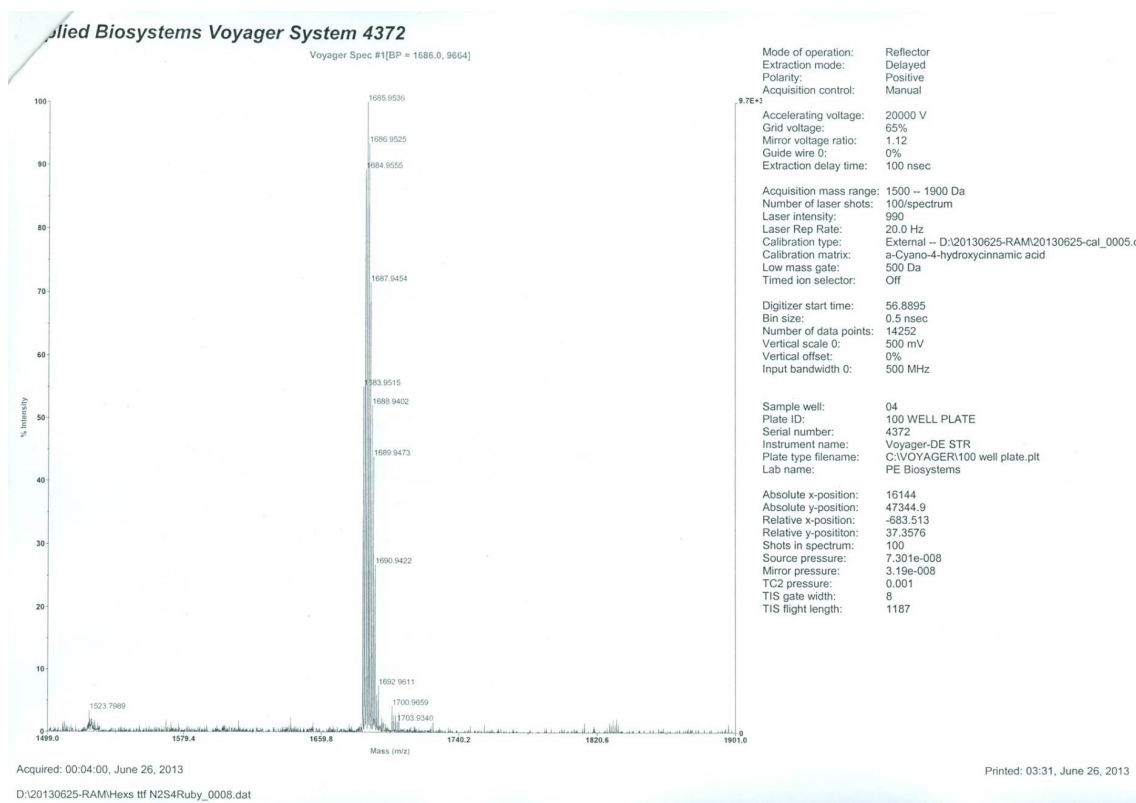

**Figure S8.** MALDI-TOF mass spectrum of compound **2**

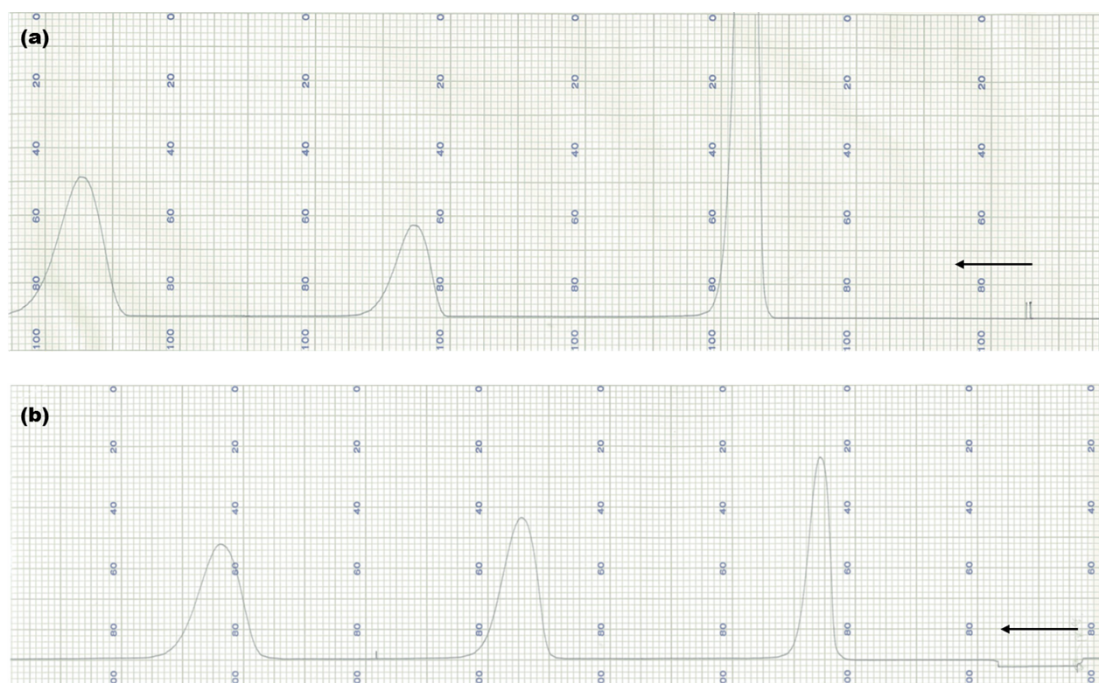

**Figure S9.** HPLC traces of (a) **1** and (b) **2** eluted by  $\text{CH}_2\text{Cl}_2$  with flow rate of 4 mL/min.

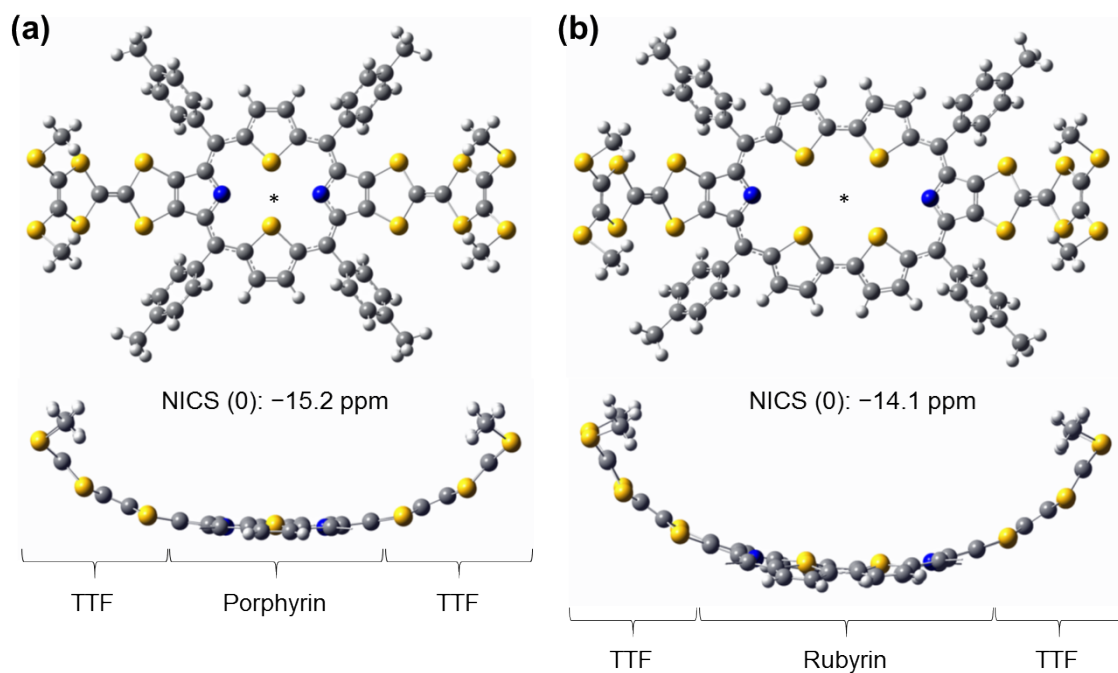

**Figure S10.** Ball-and-stick models of the optimized structures for (a) **1** and (b) **2** obtained by DFT calculations (B3LYP/6-31G\*). NICS values are determined at the global center of the macrocycles, respectively.

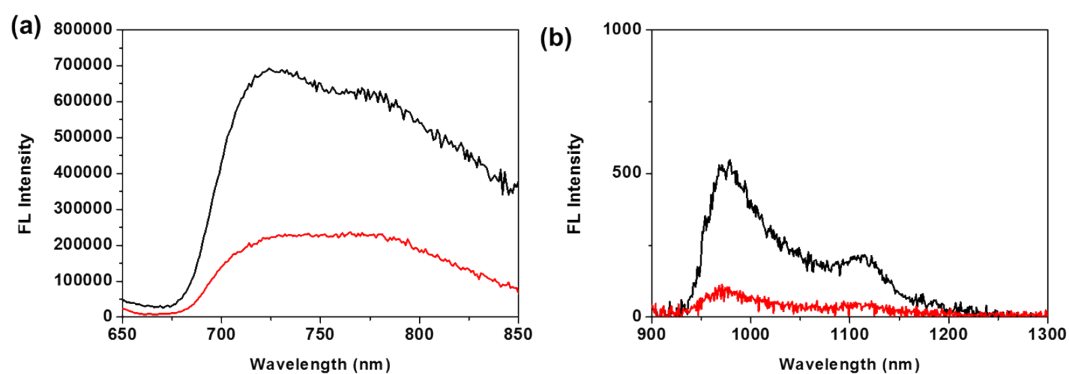

**Figure S11.** Comparative fluorescence spectra of (a) **1** and (b) **2** recorded in  $\text{CH}_2\text{Cl}_2$  (black) and THF (red).

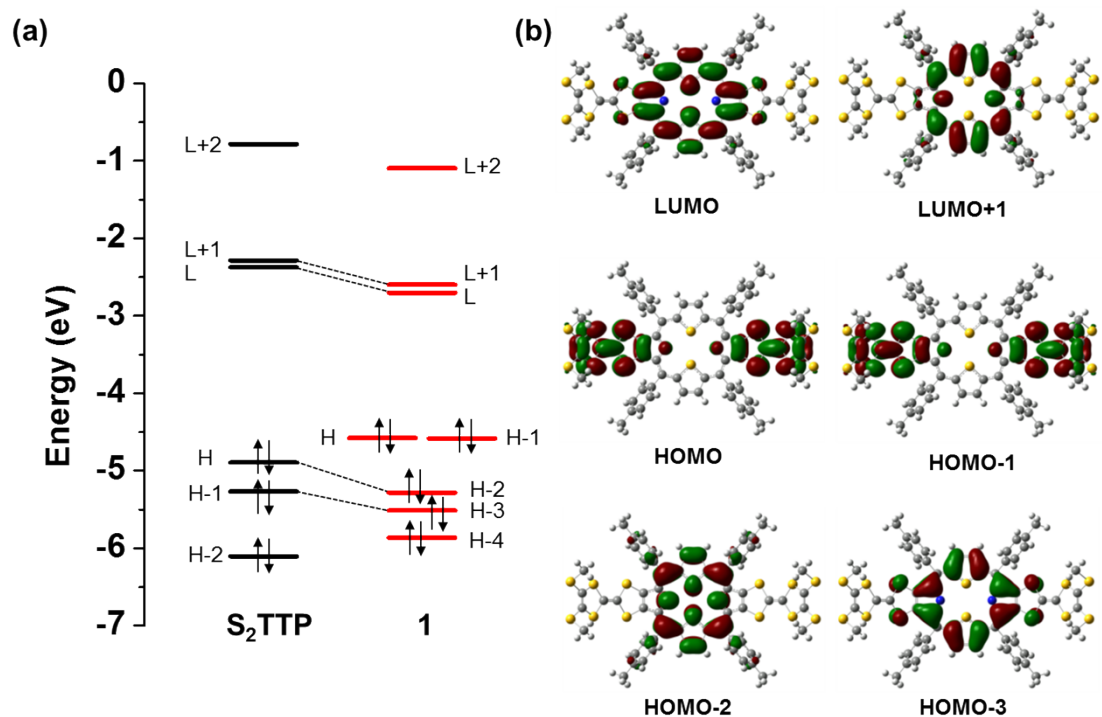

**Figure S12.** (a) Molecular orbital energy diagrams for **1** and  $S_2TTP$  obtained by B3LYP/6-31G\* level calculations and (b) the selected frontier MO density maps of **1**.

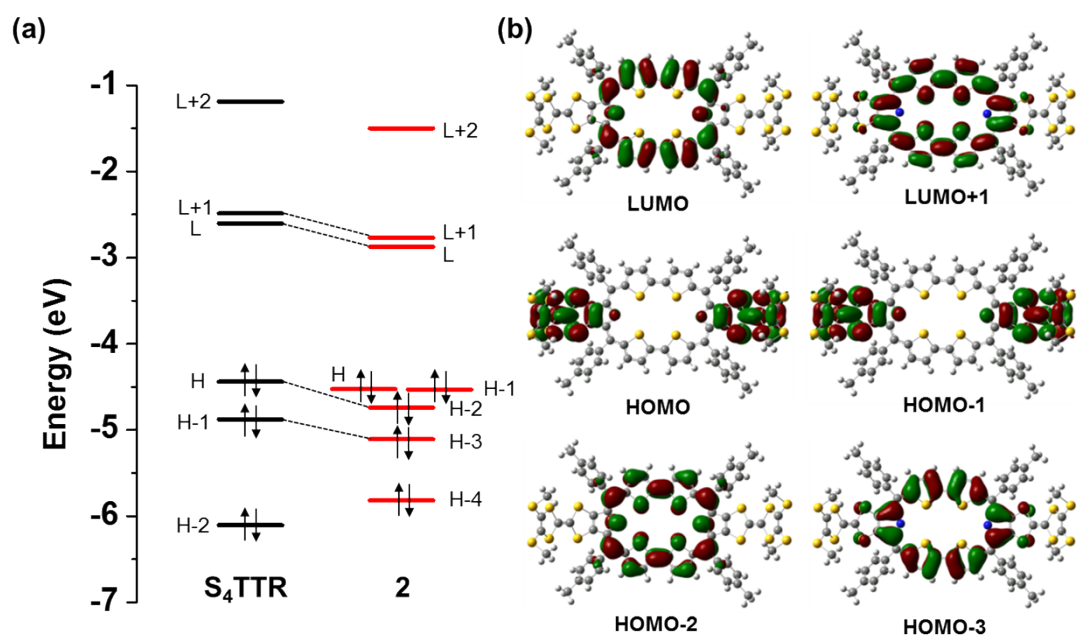

**Figure S13.** (a) Molecular orbital energy diagrams for **2** and  $S_4TTR$  obtained by B3LYP/6-31G\* level calculations and (b) the selected frontier MO density maps of **2**.

Fi

level calculations and (b) the selected frontier MO density maps of **2**.

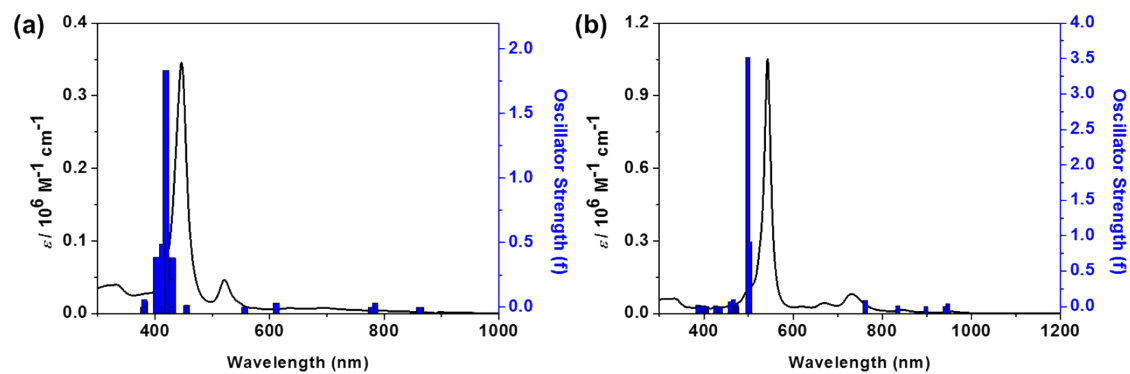

**Figure S14.** Simulated electronic states of (a) **1**, (b) **2** (c)  $\text{H}_2\text{1}^{2+}$  and (d)  $\text{H}_2\text{2}^{2+}$  obtained using TD-DFT calculations carried out at the B3LYP/6-31G\* level.

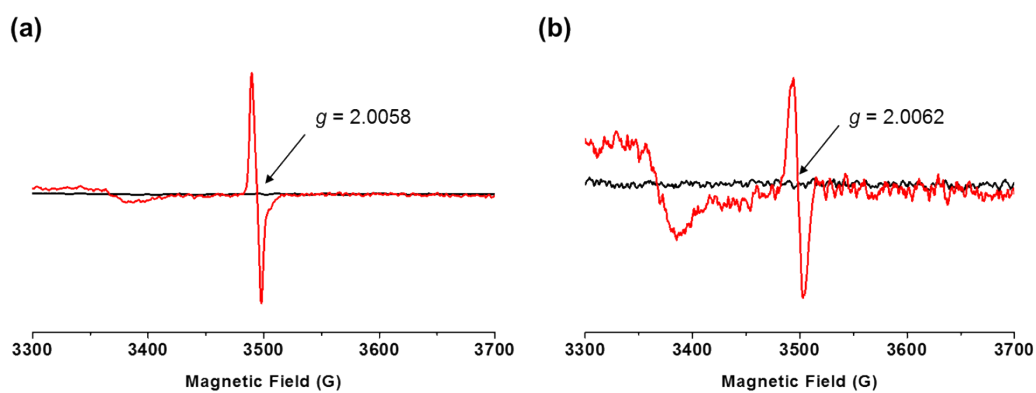

**Figure S15.** EPR spectra of (a) **1** recorded in  $\text{CH}_2\text{Cl}_2$  under dark (black) and light irradiation (red) and (b) **2** under dark (black) and light irradiation (red) conditions. [compound] = 0.1 mM.

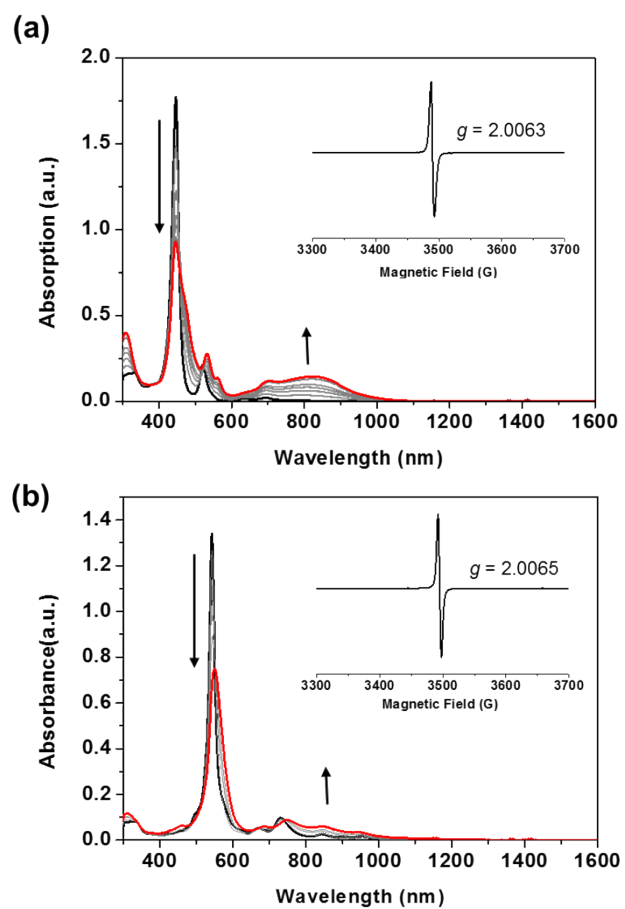

**Figure S16.** UV-vis-NIR absorption spectral changes upon chemical oxidation of (a) **1** and (b) **2** with *Magic Blue* in  $\text{CH}_2\text{Cl}_2$ . Insets show the EPR spectra of radical cation species of **1** and **2**, respectively.

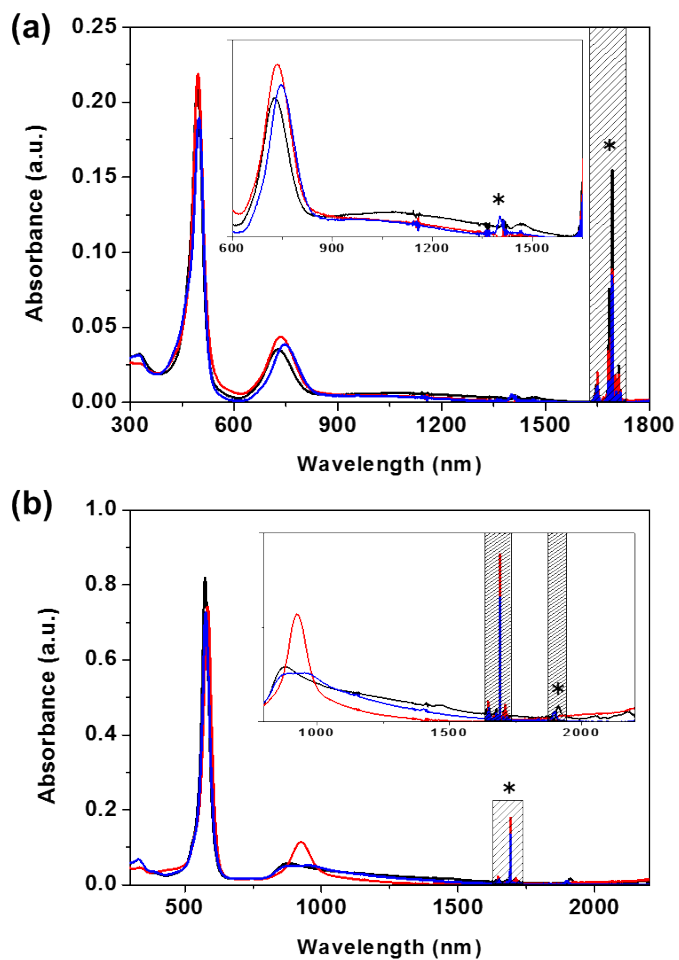

**Figure S17.** UV-vis-NIR spectra of (a)  $\text{H}_2\text{I}^{2+}$  and (b)  $\text{H}_2\text{2}^{2+}$  obtained using different acids; TFA (black), HCl (blue) and MSA (red) in  $\text{CH}_2\text{Cl}_2$  solution. Asterisks indicate the solvent scattering peaks.

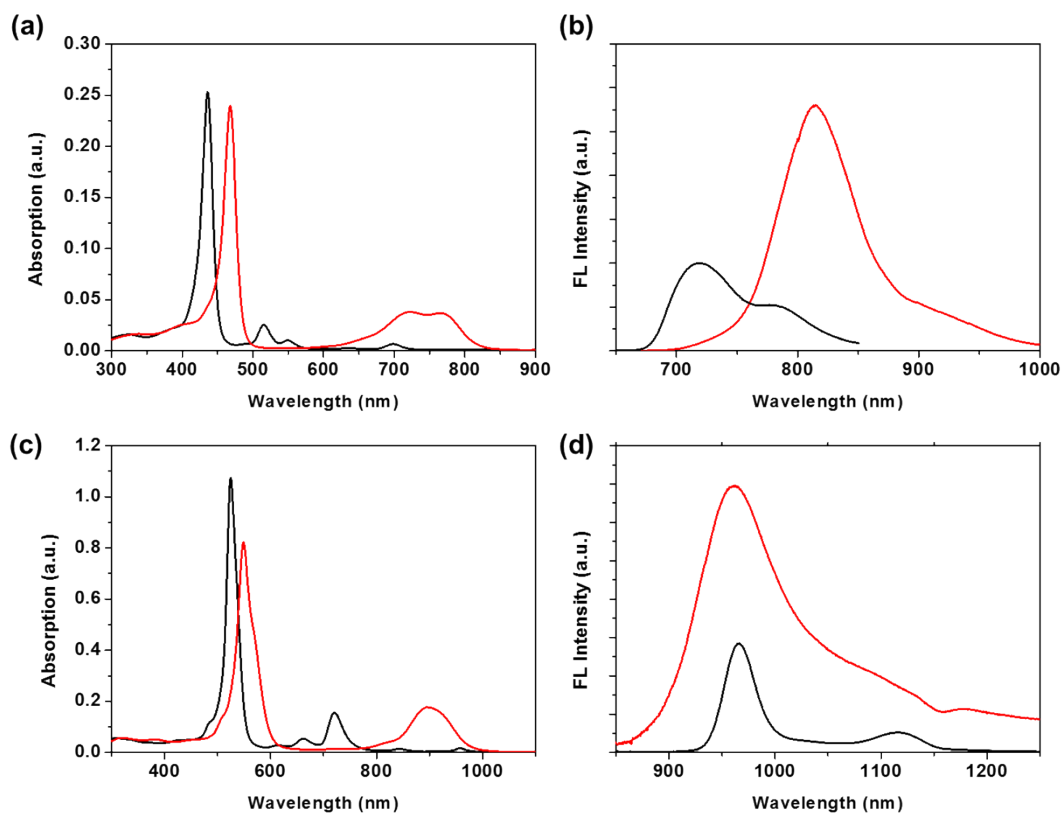

**Figure S18.** UV-vis-NIR absorption and emission spectra (black line) of reference compounds, (a, b) **S<sub>2</sub>TTP** and (c, d) **S<sub>4</sub>TTR** recorded in CH<sub>2</sub>Cl<sub>2</sub>, respectively. In the presence of TFA, the spectral changes of **S<sub>2</sub>TTP** and **S<sub>4</sub>TTR** were seen (red line).

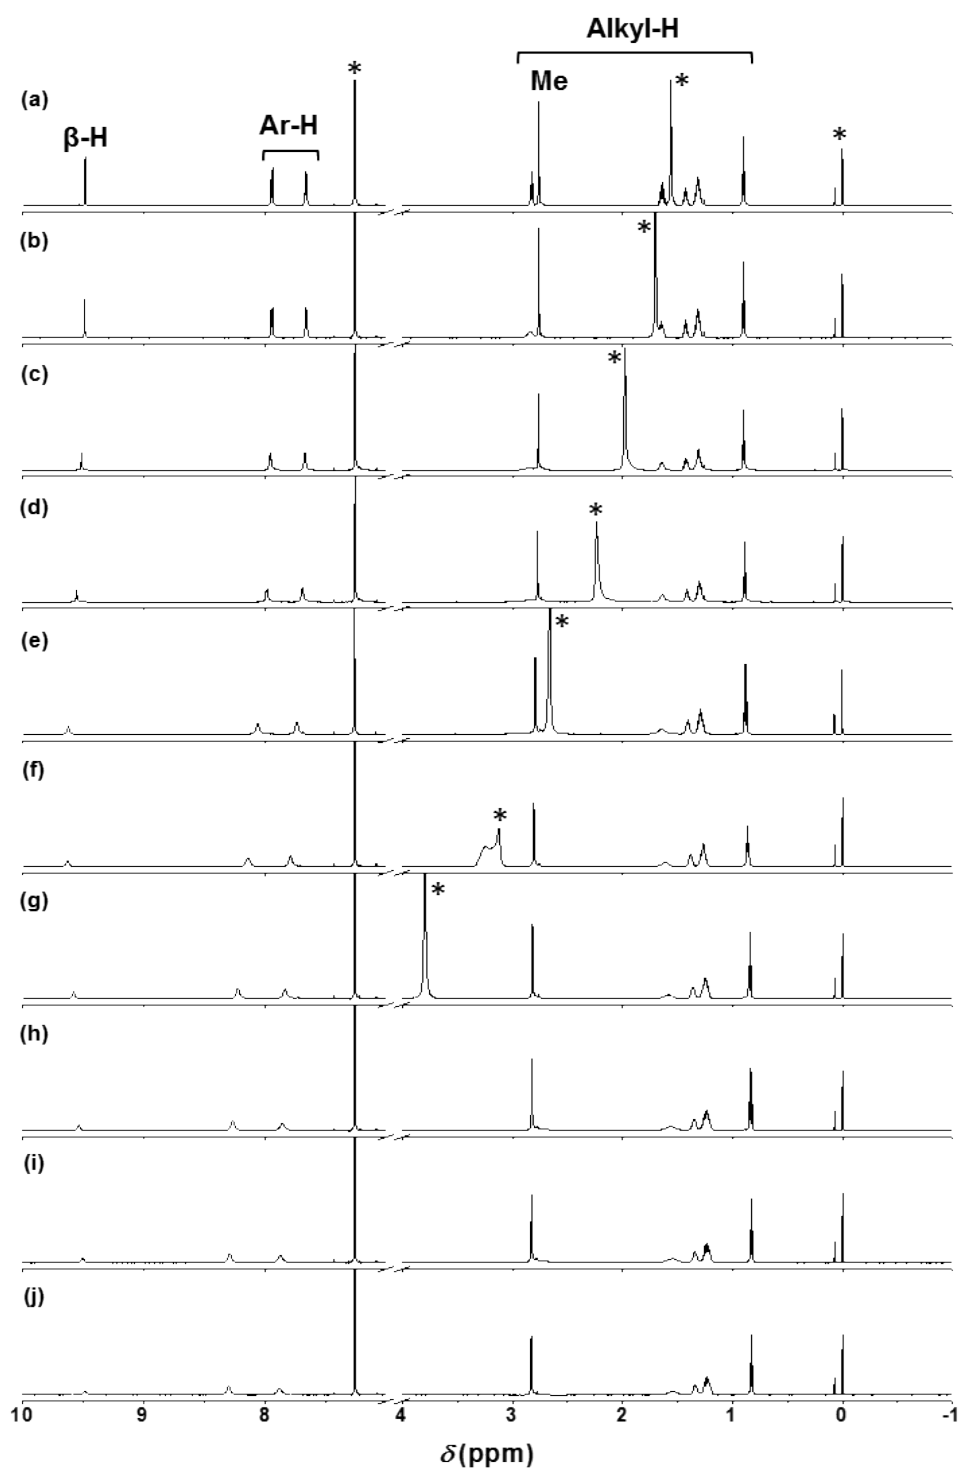

**Figure S19.**  $^1\text{H}$  NMR spectral change of **1** in  $\text{CDCl}_3$  upon addition of TFA.  $[\text{TFA}] =$  (a) 0 equiv. (b-j) 1-32 equiv. Asterisks indicate the residual solvent and impurities.



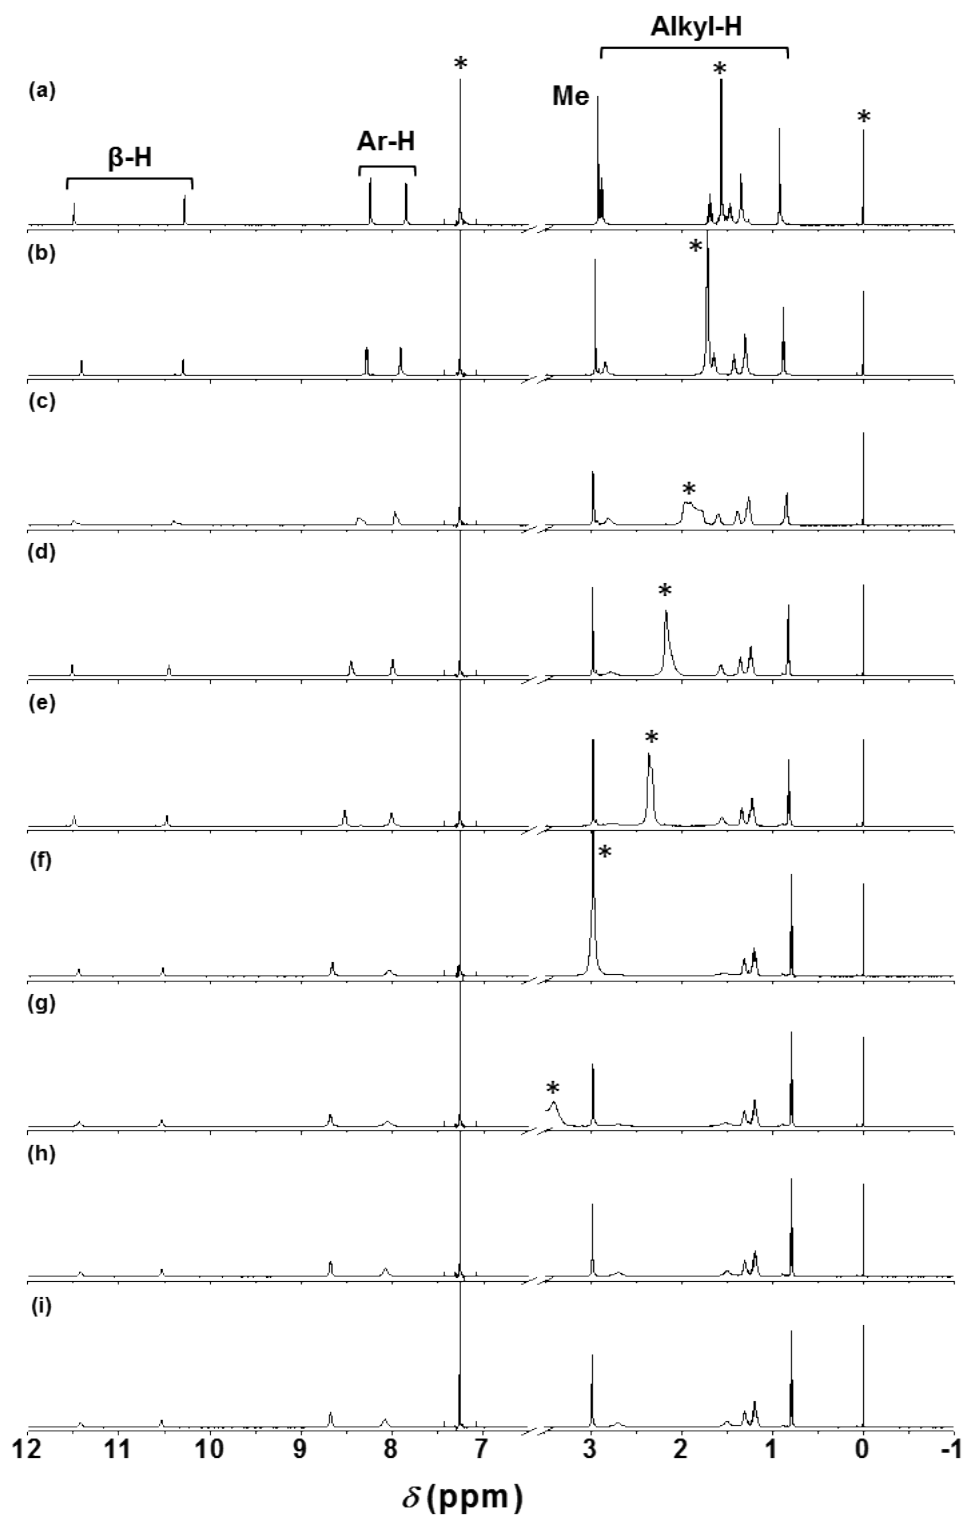

**Figure S20.**  $^1\text{H}$  NMR spectral change of **2** in  $\text{CDCl}_3$  upon addition of TFA. [TFA] = (a) 0 equiv. (b-j) 1-28 equiv. Asterisks indicate the residual solvent and impurities.

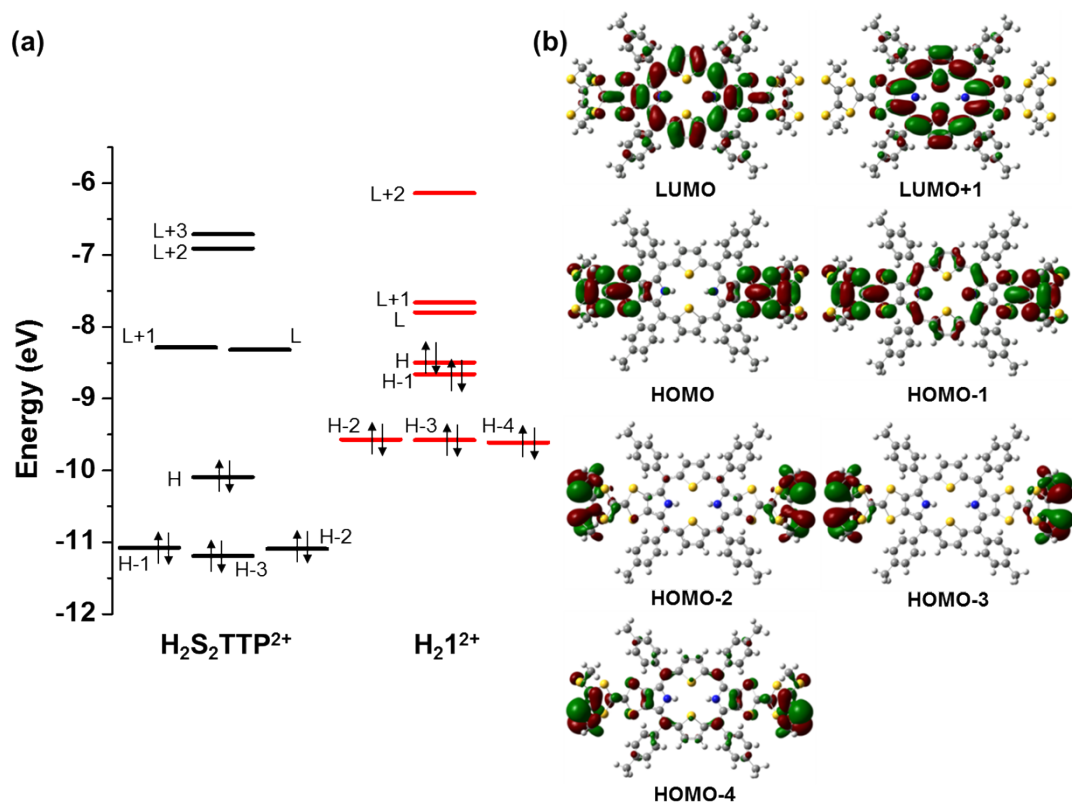

**Figure S21.** (a) Molecular orbital energy diagrams for  $\text{H}_2\text{I}^{2+}$  and  $\text{H}_2\text{S}_2\text{TTP}^{2+}$  obtained by B3LYP/6-31G\* level calculations and (b) the selected frontier MO density maps of  $\text{H}_2\text{I}^{2+}$ .

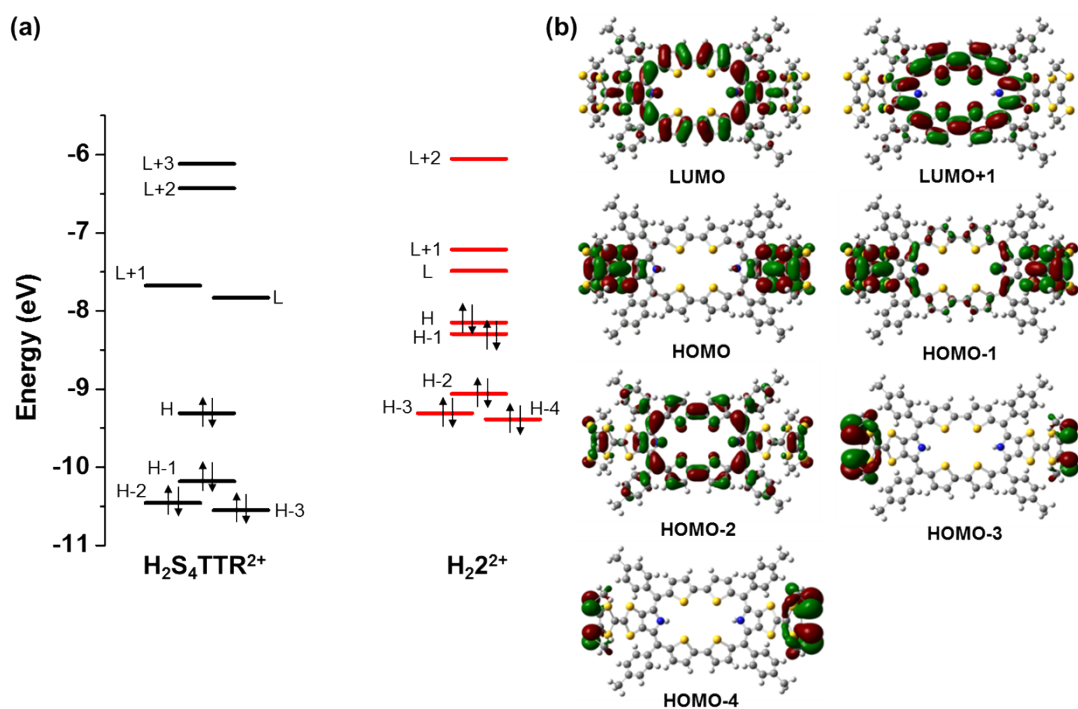

**Figure S22.** (a) Molecular orbital energy diagrams for  $\text{H}_2^{2+}$  and  $\text{H}_2\text{S}_4\text{TTR}^{2+}$  obtained by B3LYP/6-31G\* level calculations and (b) the selected frontier MO density maps of  $\text{H}_2^{2+}$ .

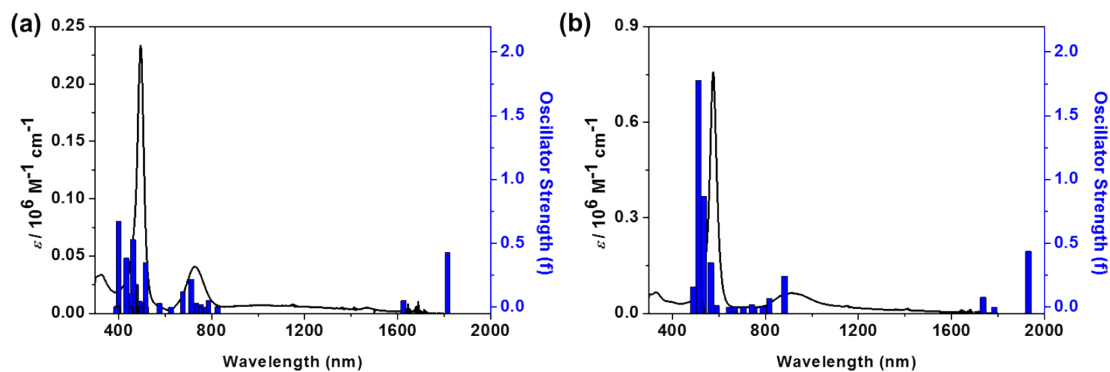

**Figure S23.** UV-vis-NIR absorption spectra (solid line) of  $\text{H}_2^{2+}$  and  $\text{H}_2^{1+}$  in  $\text{CH}_2\text{Cl}_2$  along with the theoretical vertical excitation energies (blue bar) obtained from TD-DFT calculations at B3LYP/6-31g(d) level.
